# Supplementary material for: Hypoxaemia prevalence and its adverse clinical outcomes among children hospitalised with WHO-defined severe pneumonia in Bangladesh
Source: PubMed Central journal article supplement (PMC8442579; doi:10.7189/jogh.11.04053), 2021-09-11

## Supplementary Materials

Figure S1: Hypoxaemia prevalence among children aged 2-59 months admitted to icddr,b Dhaka Hospital with WHO-defined severe pneumonia between 2014-17, presented in percentage by age groups; N=2646.

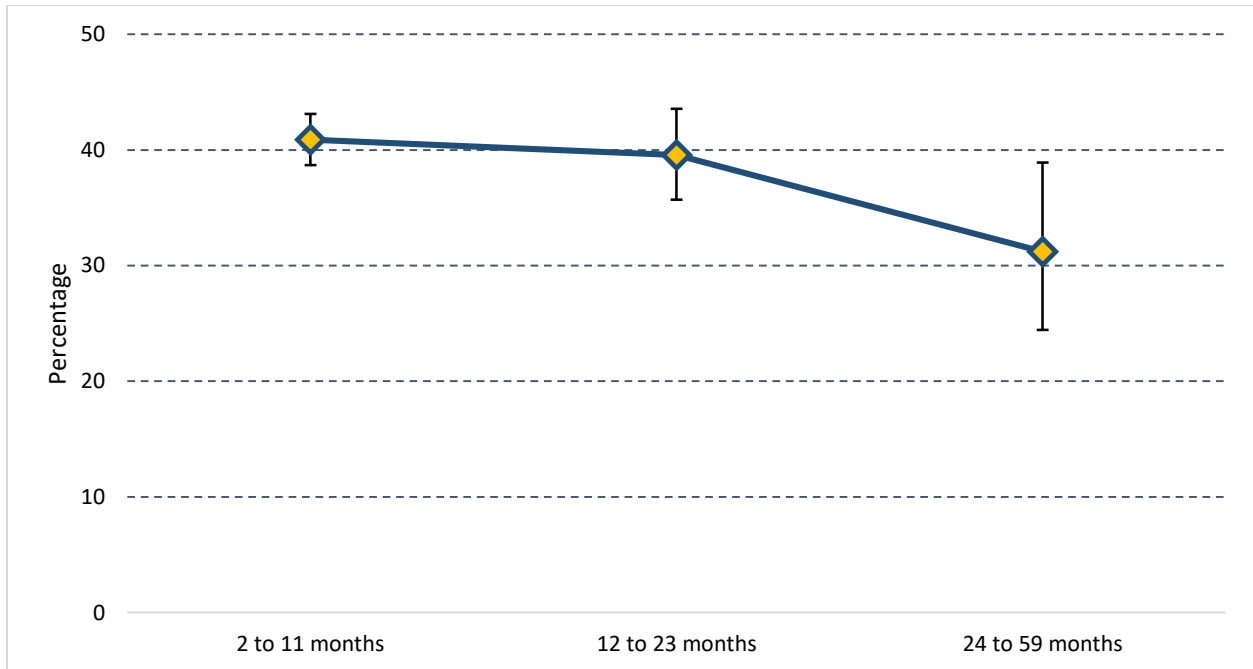

Figure S2: Distribution of hospital outcomes of children aged 2-59 months admitted to icddr,b-Dhaka Hospital with WHO-defined clinical pneumonia between 2014-17, presented in percentage by hypoxaemia status on admission.

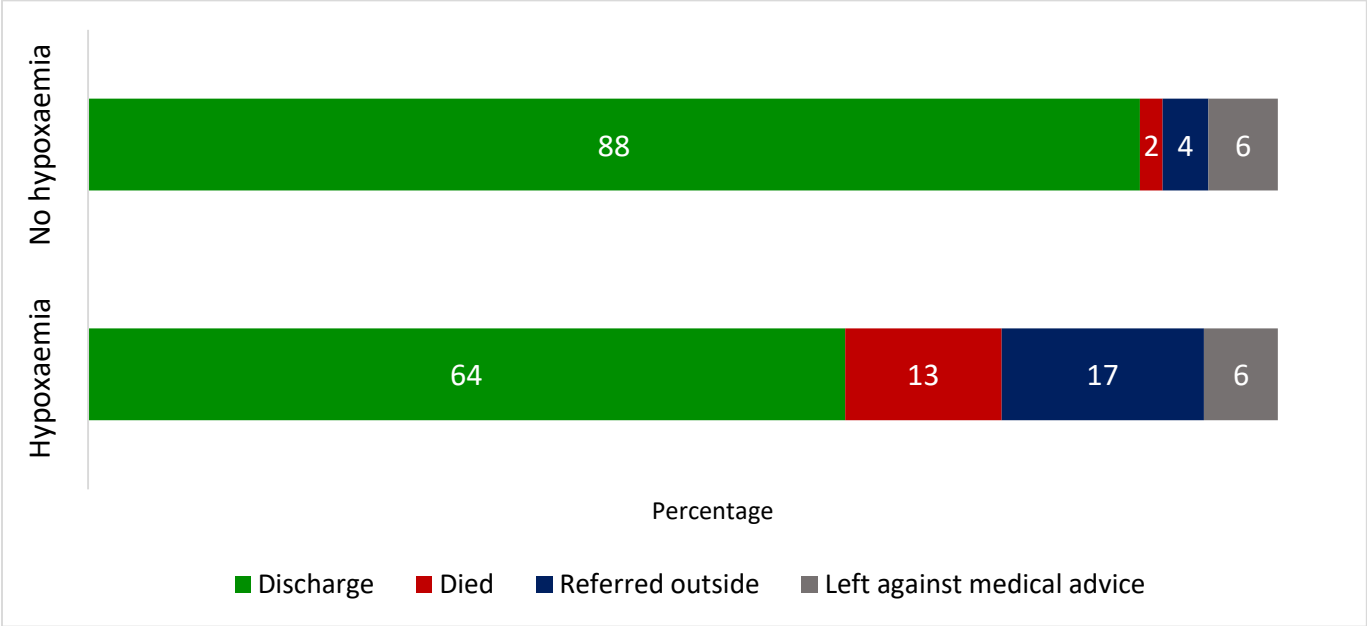

Figure S3: Trend in the case fatality rates of children aged 2-59 months admitted to icddr,b-Dhaka Hospital with WHO-defined clinical pneumonia between 2014-17, presented in percentage by hypoxaemia status on admission and disaggregated by the year.

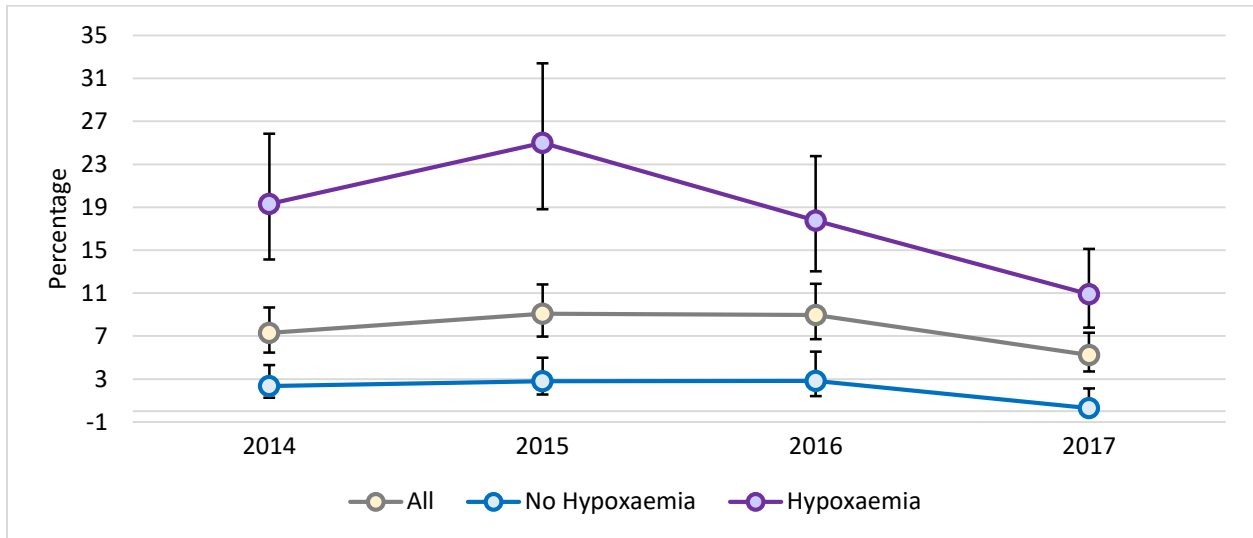

Figure S4: Risk of adverse hospital outcomes among children aged 2-59 months admitted to icddr,b Dhaka Hospital with WHO-defined severe pneumonia and hypoxaemia between 2014-17, presented in adjusted odds ratio; N=2646.

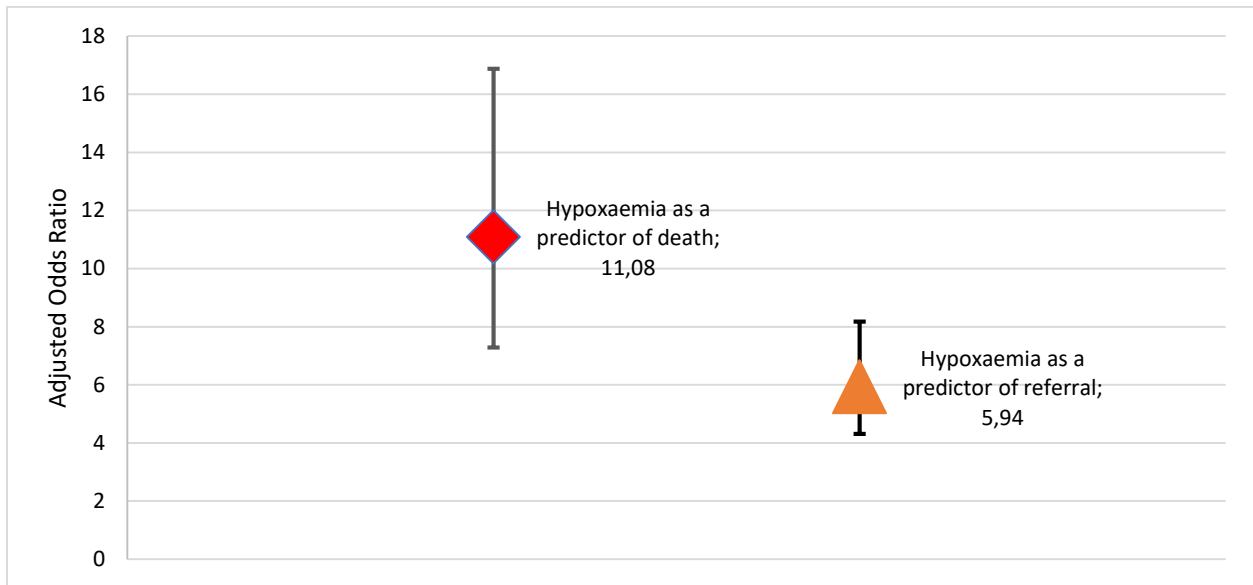

Supplement: jogh-11-04053-s001.pdf [file jogh-11-04053-s001.pdf]
